# Supplementary material for: TTMPP: An efficient organocatalyst in the ring-opening of aziridines with silylated nucleophiles
Source: Royal Society of Chemistry journal article supplement (doi:10.1039/b908322g), 2009-01-01

## Electronic Supplementary Information

### TTMPP: An efficient organocatalyst in the ring-opening of aziridines with silylated nucleophiles.

Satoru Matsukawa\* and Kumiko Tsukamoto

Department of Science Education, Faculty of Education, Ibaraki University

Mito, Ibaraki 310-8512, Japan

#### Copies of $^1\text{H}$ and $^{13}\text{C}$ NMR Spectra of products **2h**, **3a** – **3g** and **4f**

|                                                                                          |    |
|------------------------------------------------------------------------------------------|----|
| $^1\text{H}$ NMR and $^{13}\text{C}$ NMR spectra of <b>2h</b>                            | 2  |
| $^1\text{H}$ NMR and $^{13}\text{C}$ NMR spectra of <b>3a</b> <sup>1</sup>               | 3  |
| $^1\text{H}$ NMR and $^{13}\text{C}$ NMR spectra of <b>3b</b> <sup>1</sup>               | 4  |
| $^1\text{H}$ NMR and $^{13}\text{C}$ NMR spectra of <b>3c</b> <sup>1</sup>               | 5  |
| $^1\text{H}$ NMR and $^{13}\text{C}$ NMR spectra of <b>3d</b> <sup>1</sup>               | 6  |
| $^1\text{H}$ NMR and $^{13}\text{C}$ NMR spectra of <b>3e</b> <sup>2</sup>               | 7  |
| $^1\text{H}$ NMR and $^{13}\text{C}$ NMR spectra of <b>3f</b> and <b>4f</b> <sup>1</sup> | 8  |
| $^1\text{H}$ NMR and $^{13}\text{C}$ NMR spectra of <b>3g</b> <sup>3</sup>               | 9  |
| $^1\text{H}$ NMR and $^{13}\text{C}$ NMR spectra of <b>3h</b>                            | 10 |

#### References

1. J. Wu, X. -L. Hou, L. -X. Dai, *J. Org. Chem.*, 2000, **65**, 1344.
2. S. Minakata, Y. Okada, Y. Oderaotoshi, M. Komatsu, *Org. Lett.*, 2005, **7**, 3509.
3. A. Hayes, G. Clarkson, M. Wills, *Tetrahedron: Asymmetry*, 2004, **15**, 2079.

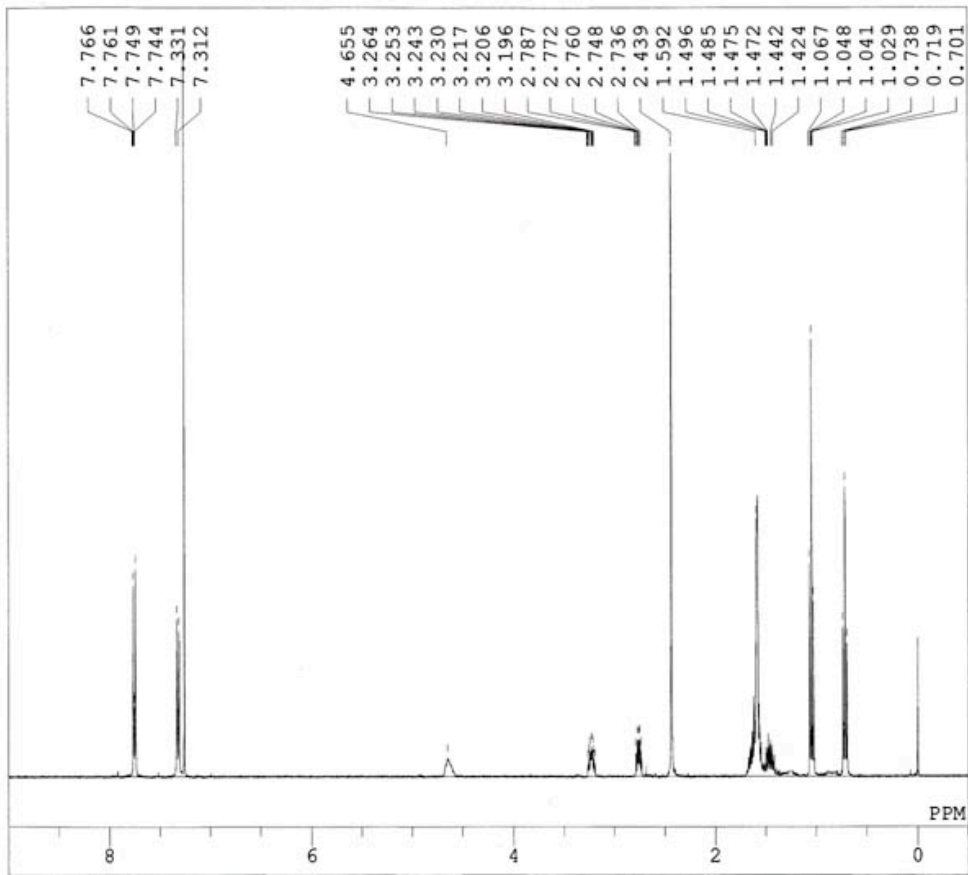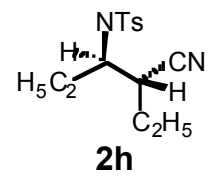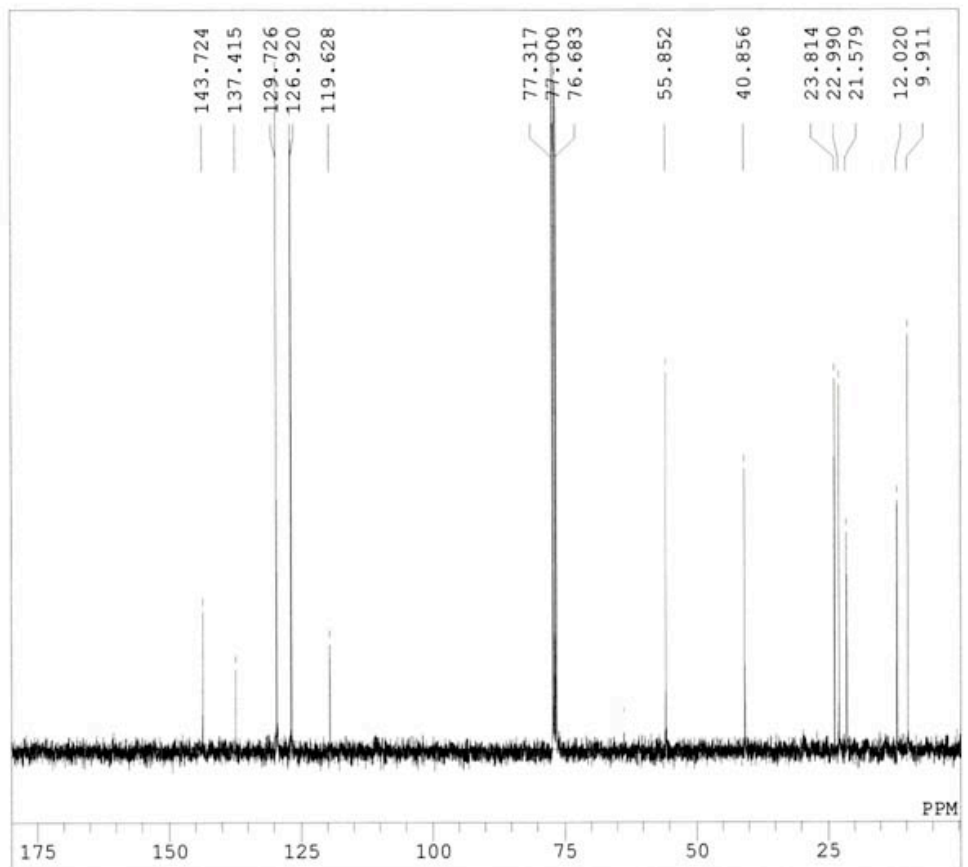

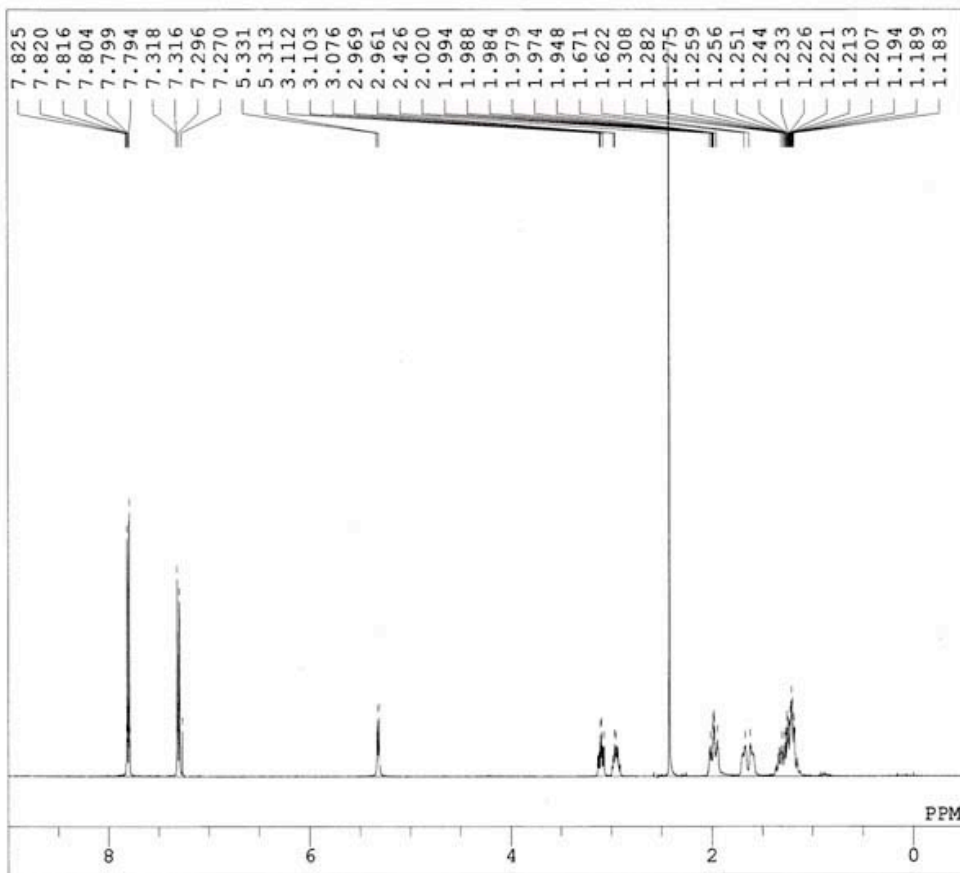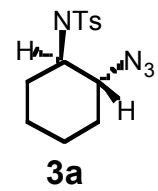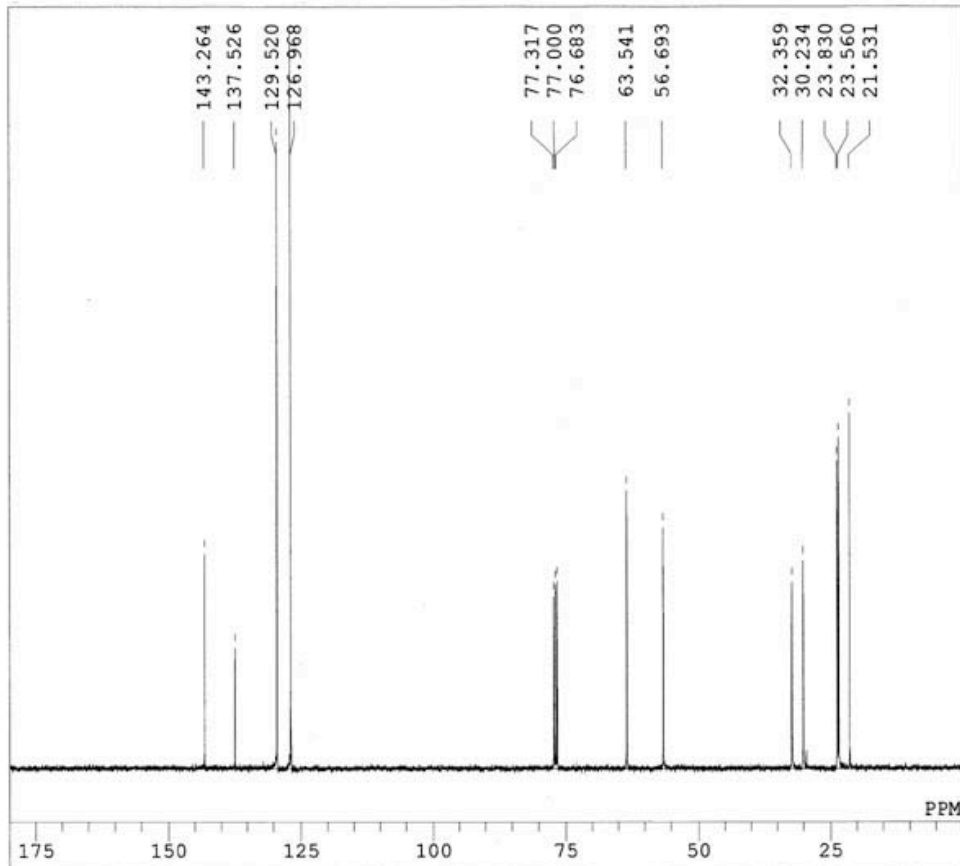

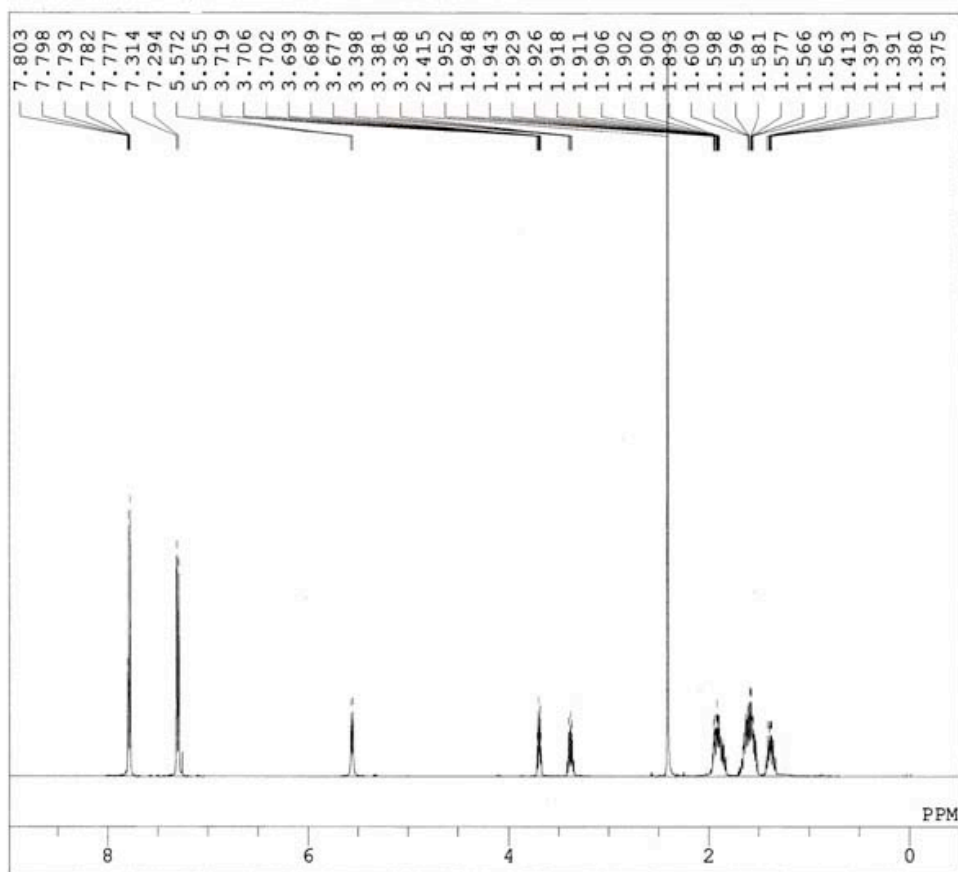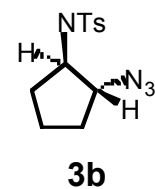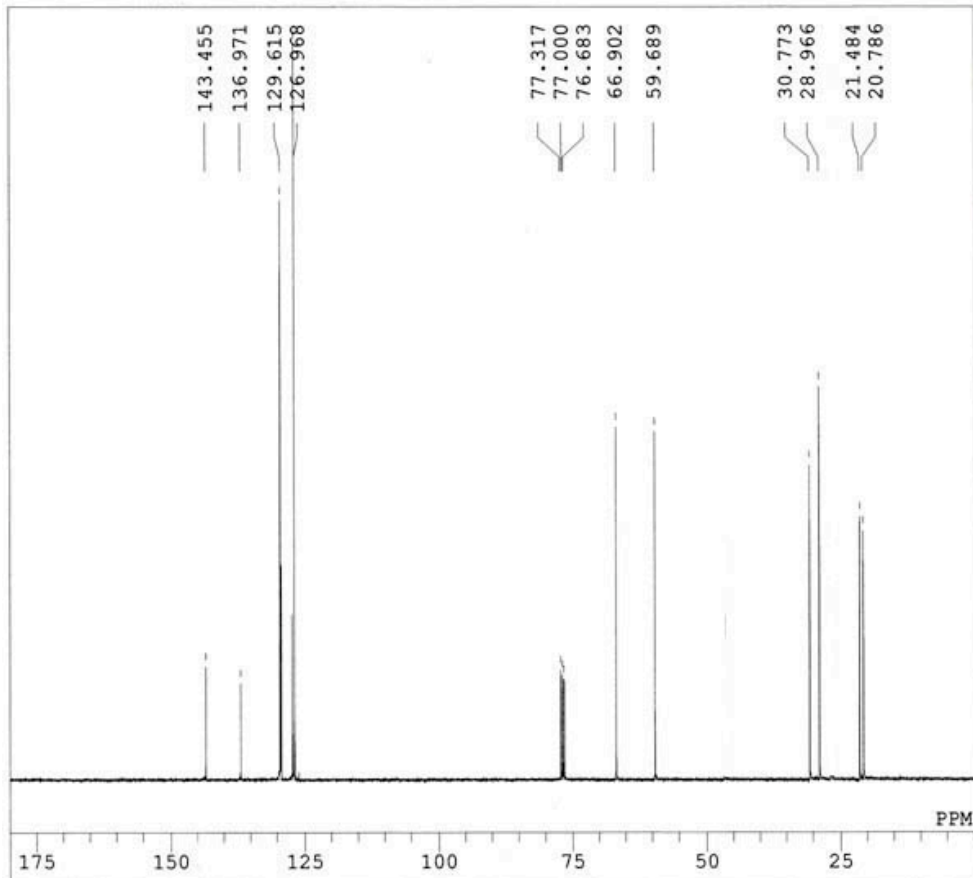

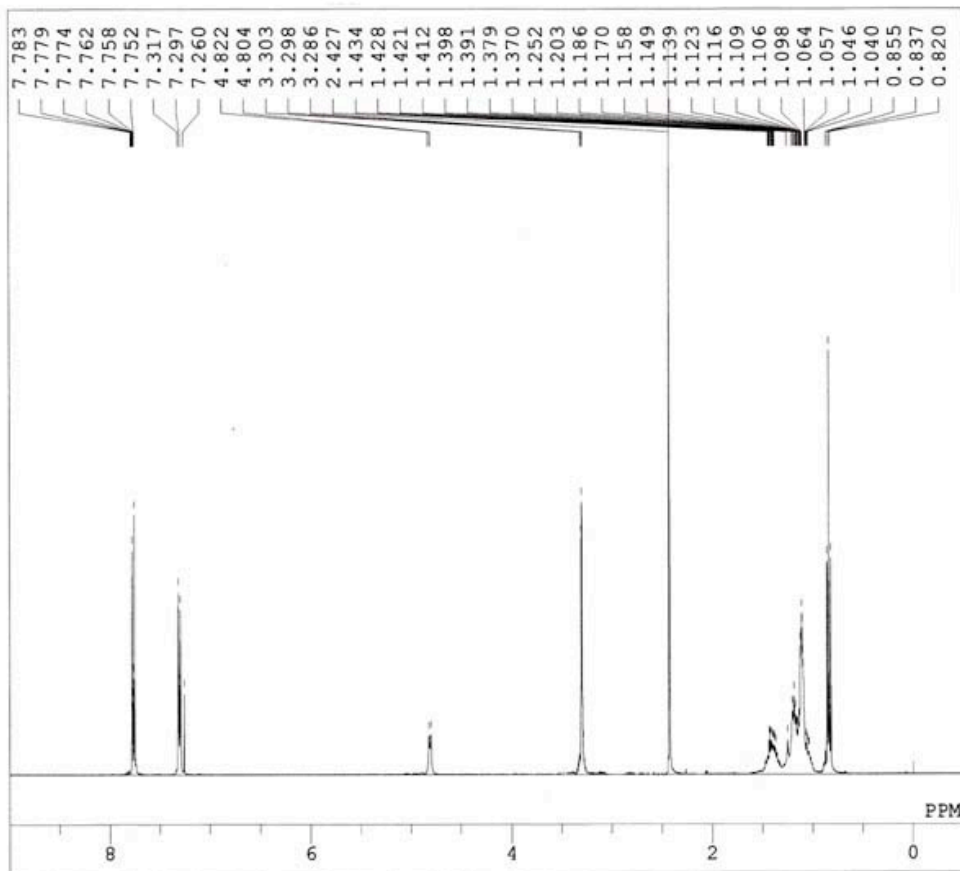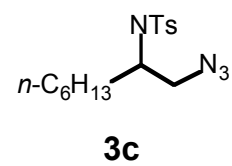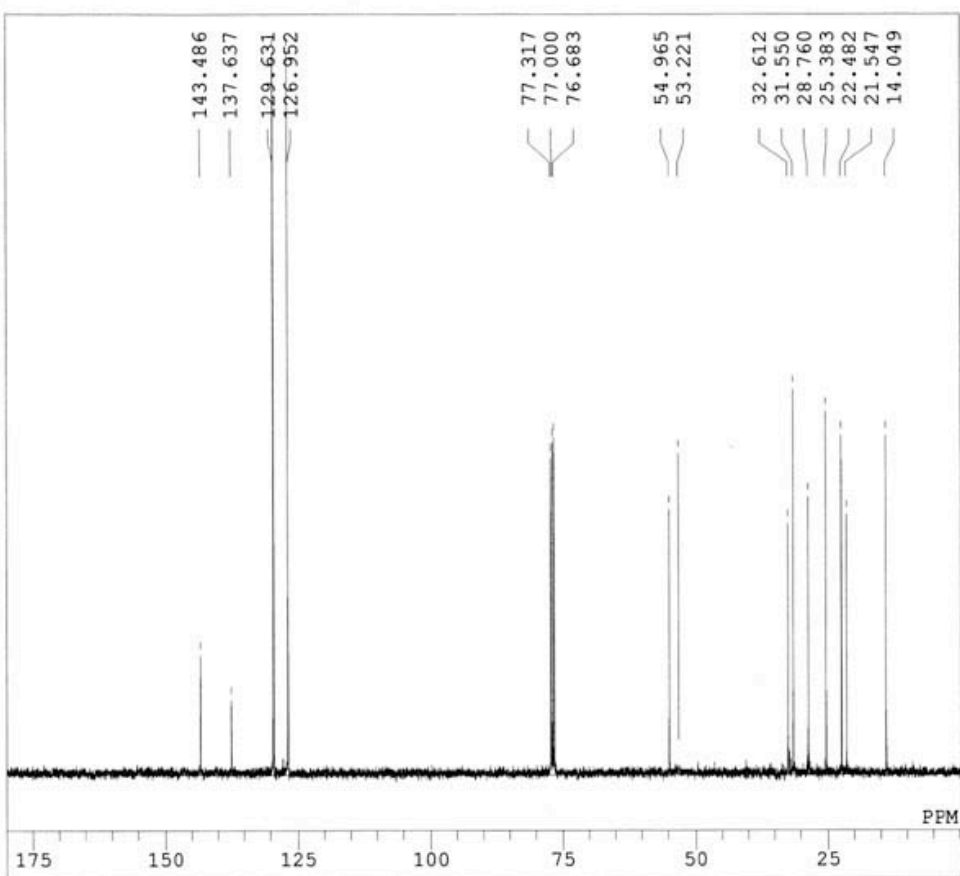

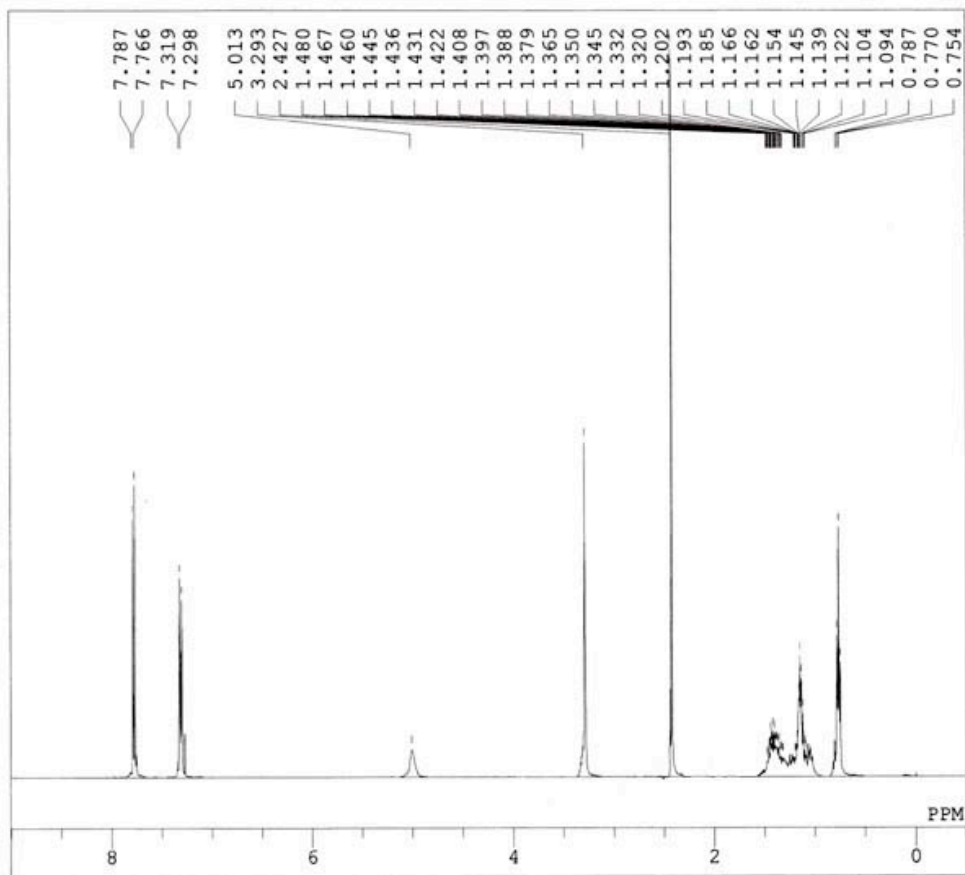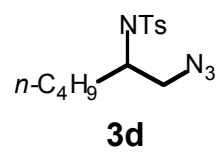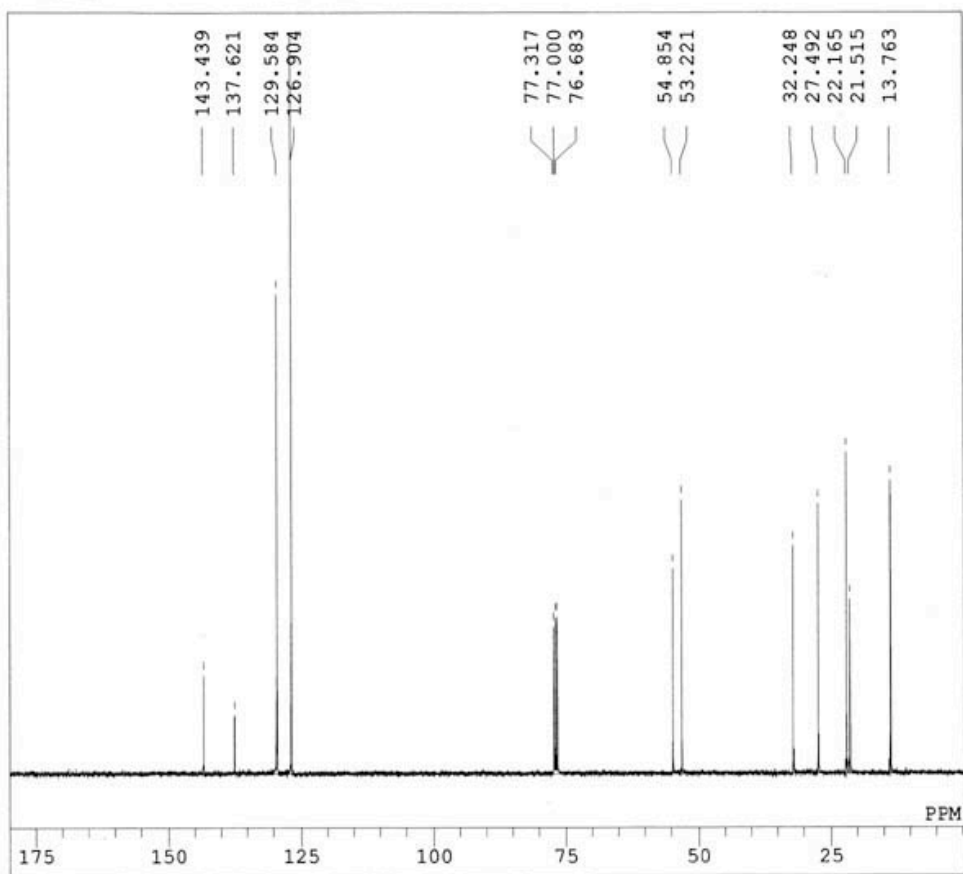

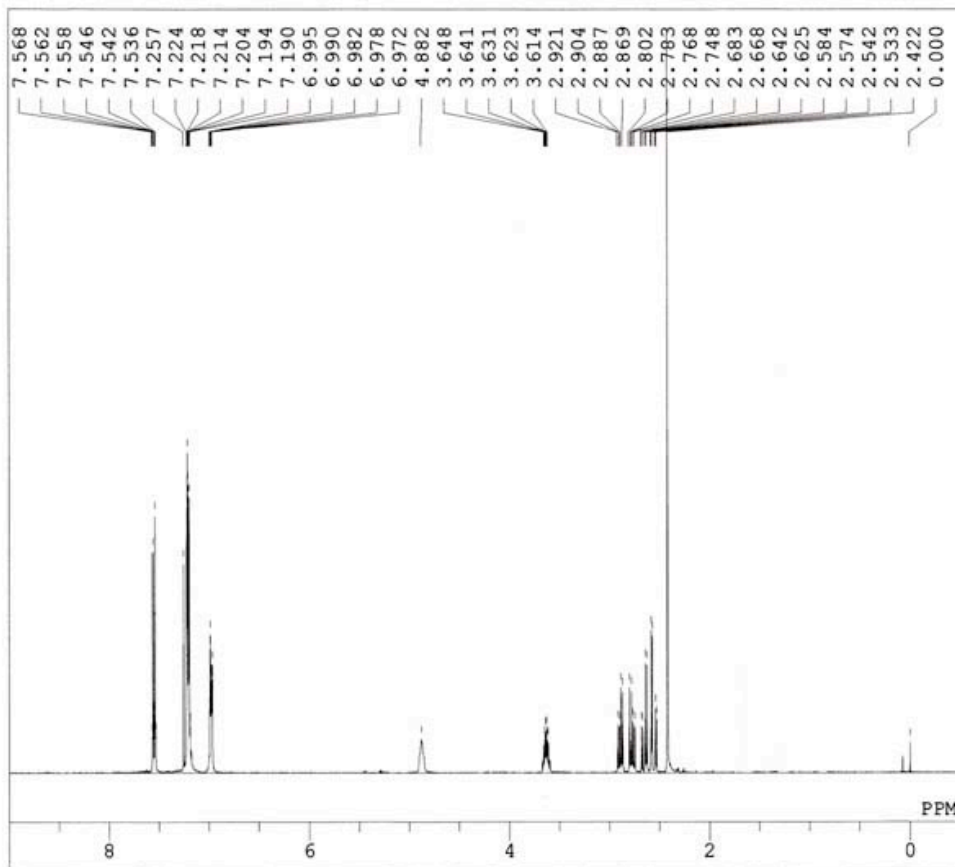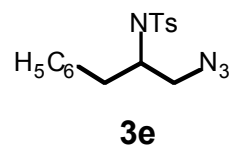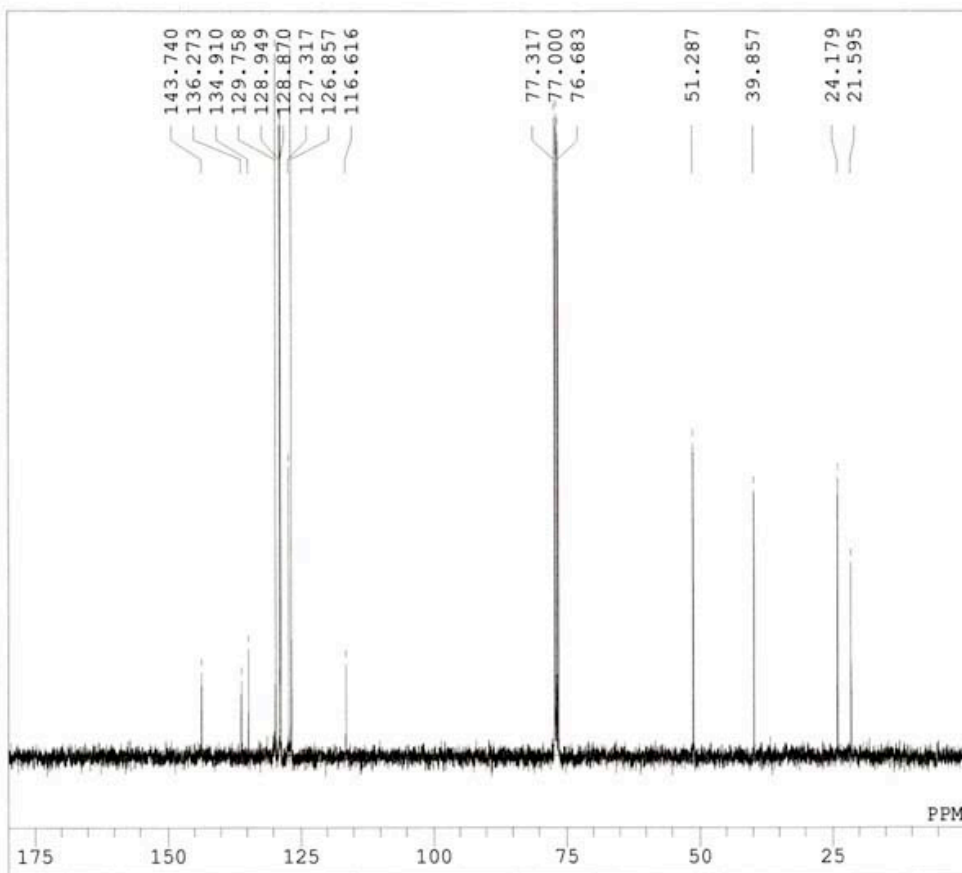

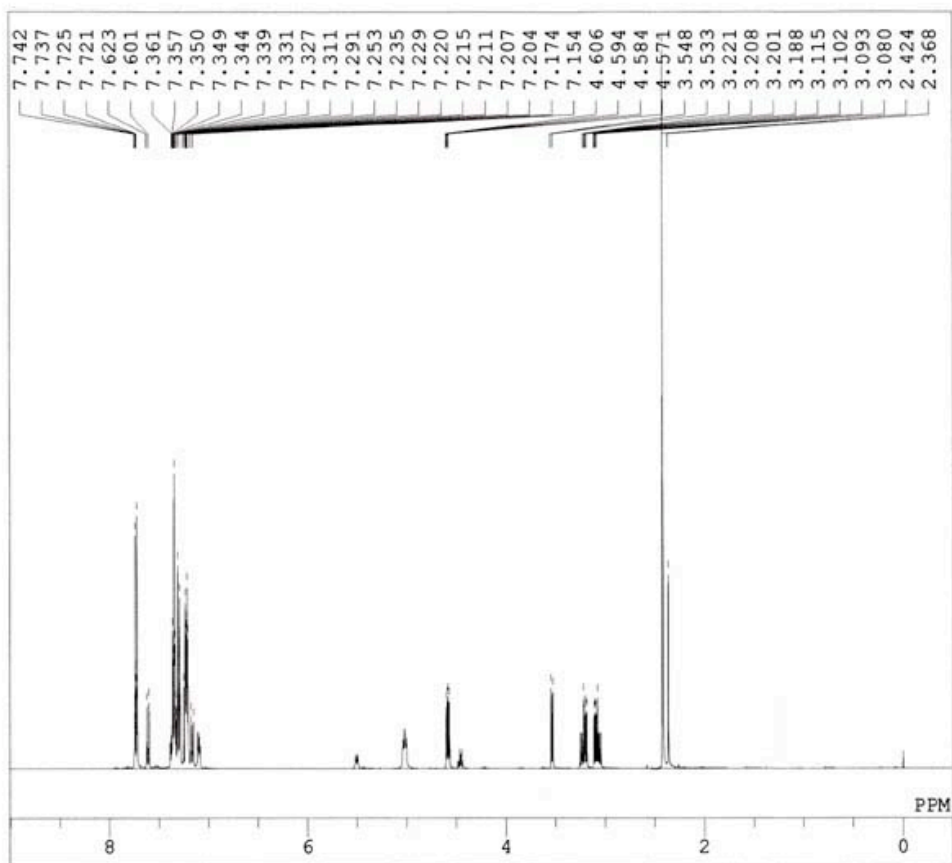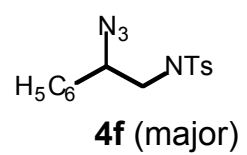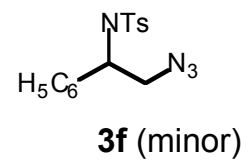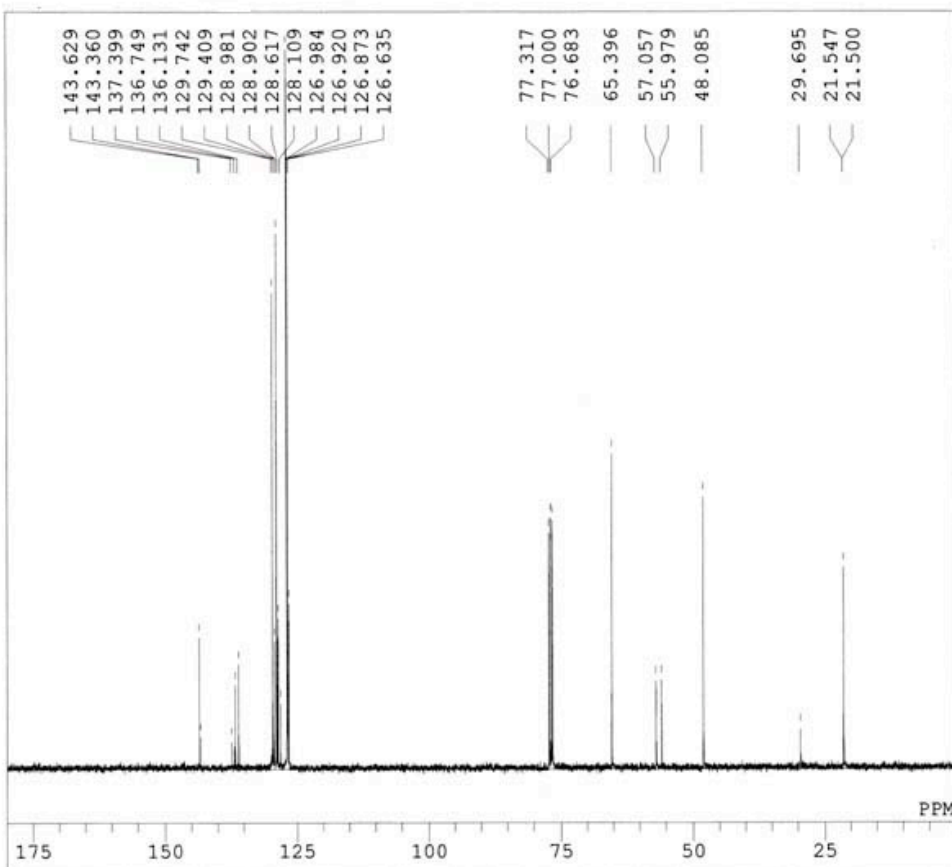



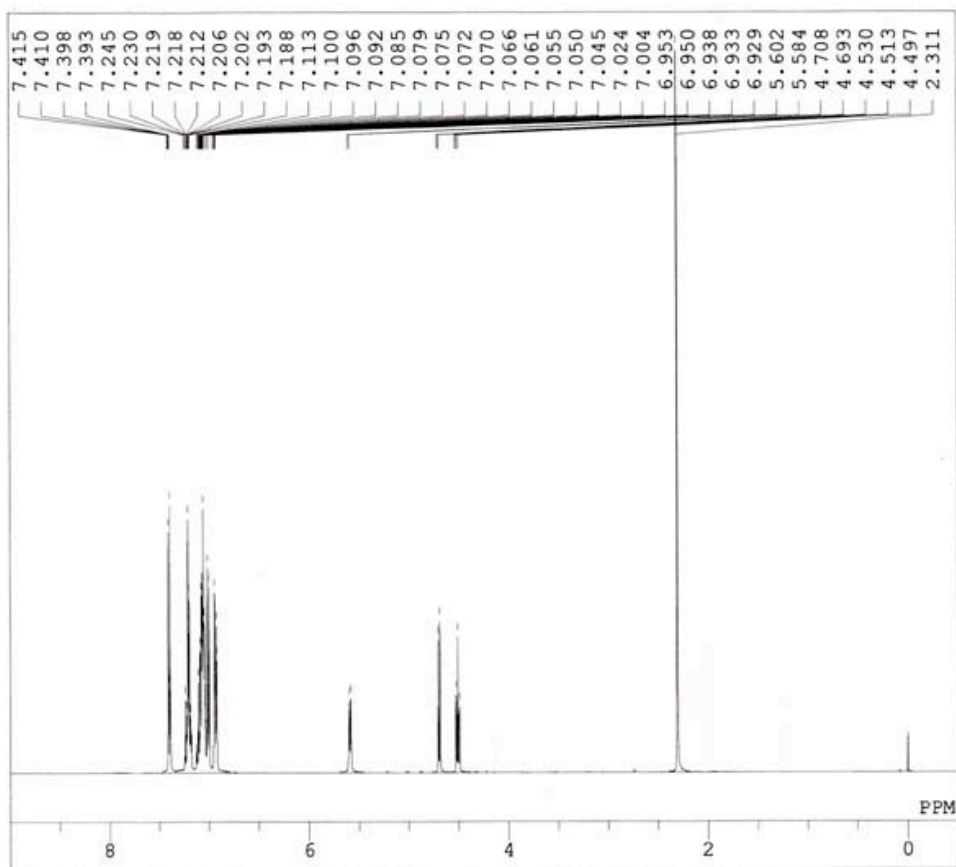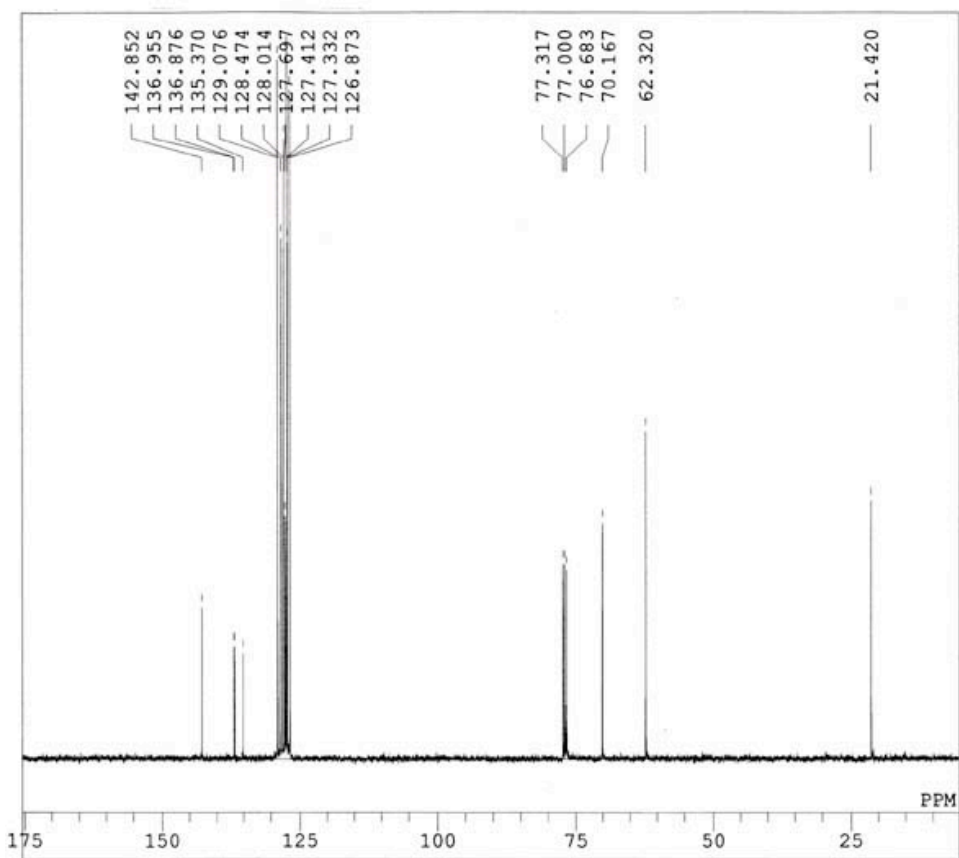

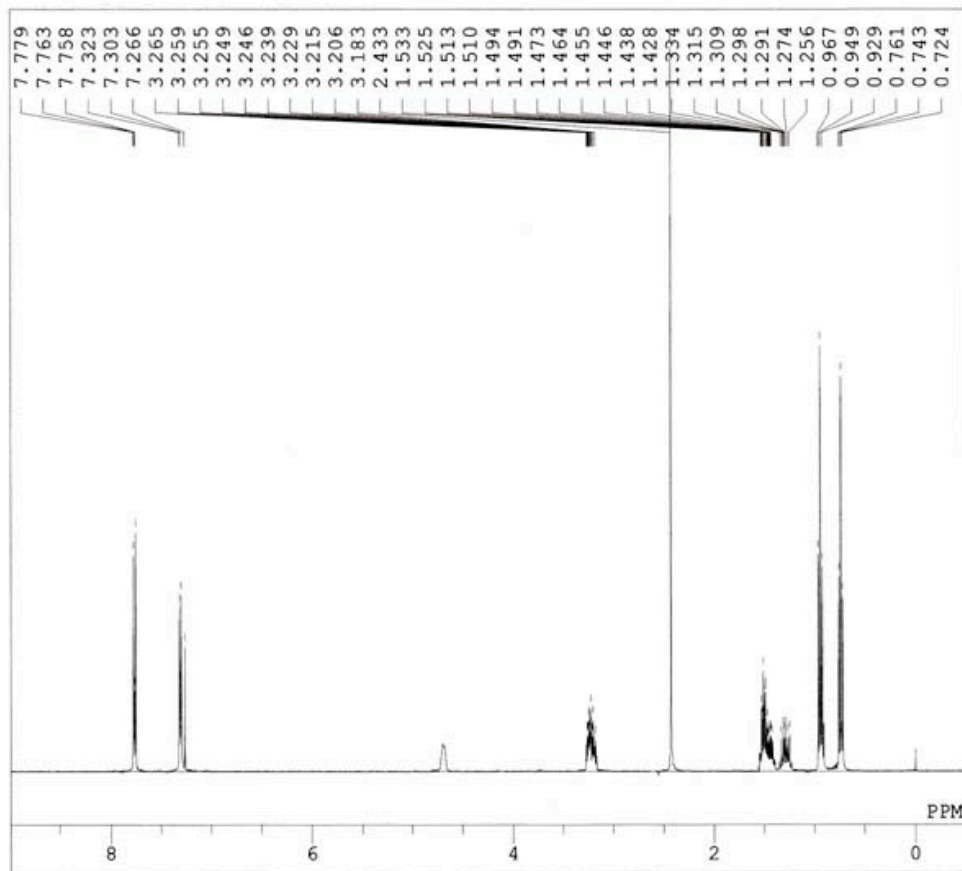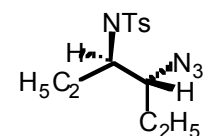

**3h**

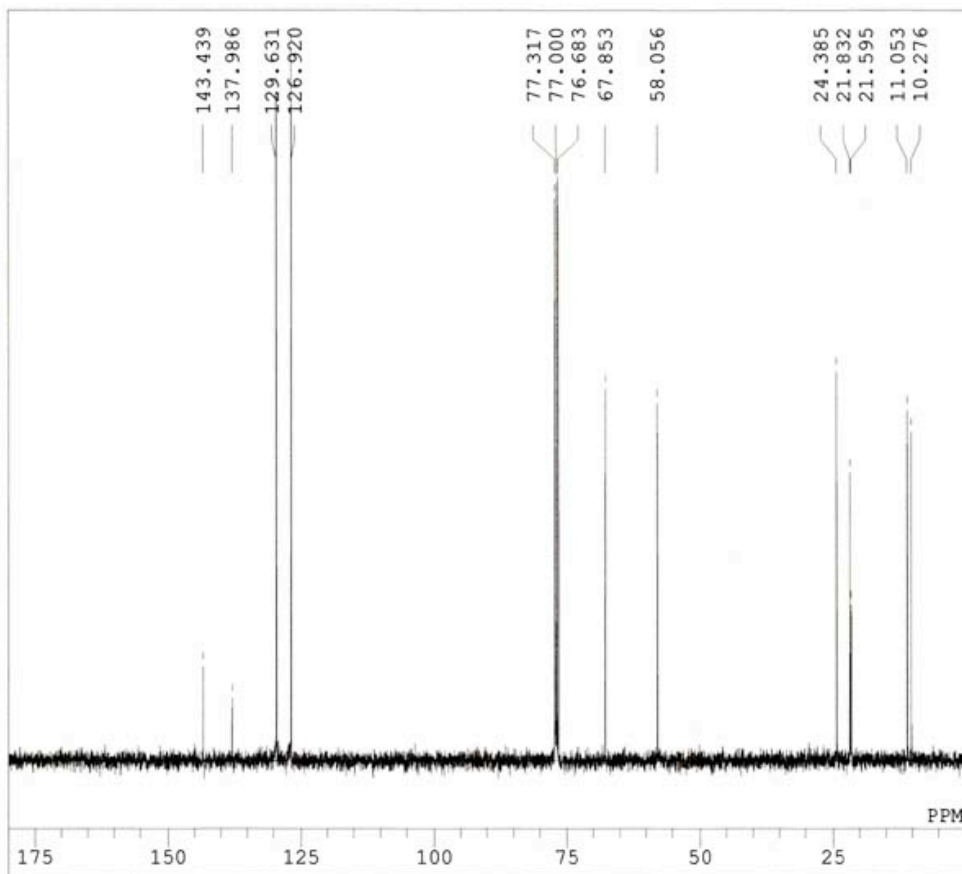

Supplement: b908322g.pdf [file b908322g.pdf]
